# Supplementary material for: Design, synthesis and shape evaluation of cerium iron oxide nanorods for an epoxide opening reaction through azide addition
Source: Royal Society of Chemistry journal article supplement (doi:10.1039/c6ra19997f), 2016-01-01
Supplement: c6ra19997f1.pdf [file c6ra19997f1.pdf]

## Supplementary information

**Table X<sub>1</sub>**

| <b>Sample</b>                                          | <b>Fe (%)</b> | <b>Ce (%)</b> | <b>O (%)</b> |
|--------------------------------------------------------|---------------|---------------|--------------|
| <b>Ce<sub>0.75</sub>Fe<sub>0.25</sub>O<sub>2</sub></b> | <b>21.34</b>  | <b>50.12</b>  | <b>28.54</b> |
